# Supplementary material for: Neutralization of MERS coronavirus through a scalable nanoparticle vaccine
Source: PubMed Central journal article supplement (PMC8384877; doi:10.1038/s41541-021-00365-w), 2021-08-24
Supplement: 41541_2021_365_MOESM1_ESM.pdf [file 41541_2021_365_MOESM1_ESM.pdf]

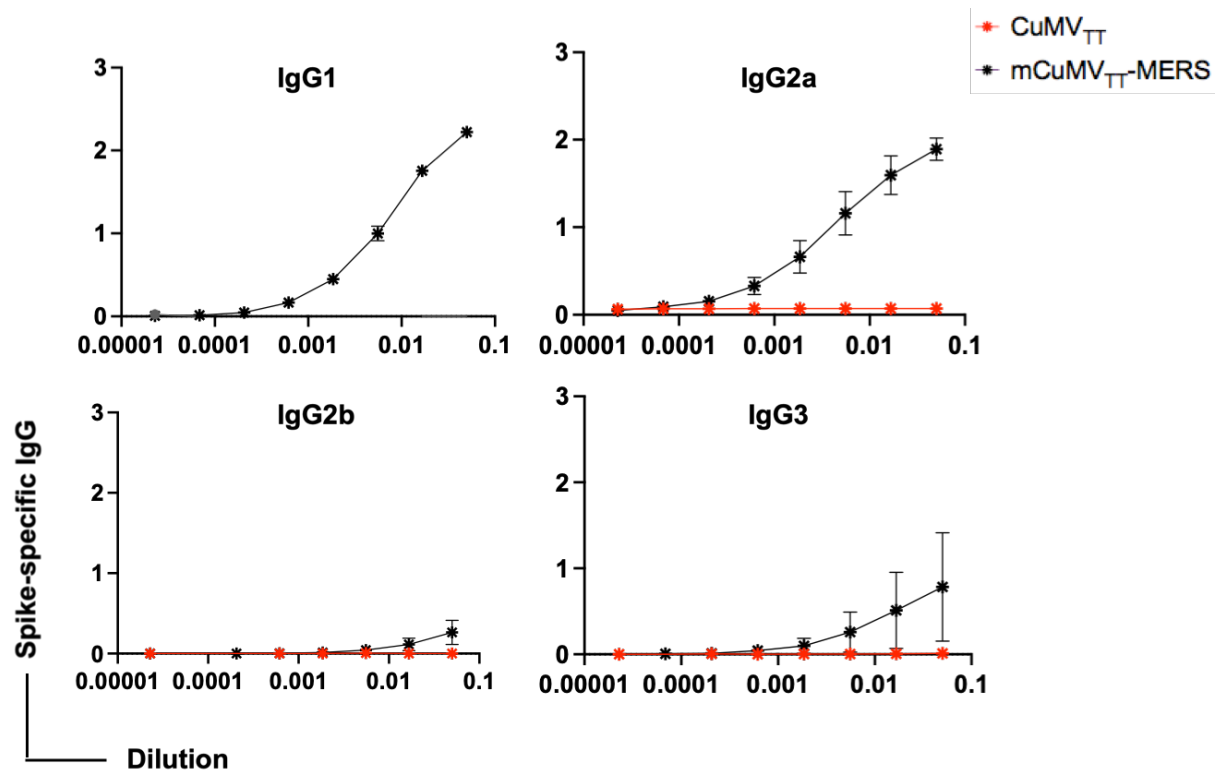

**Supplementary Figure 1. Vaccination with mCuMV<sub>TT</sub>-MERS elicits a strong humoral immune response.** Spike-specific IgG1, IgG2a, IgG2b and IgG3 titers for the groups vaccinated with CuMV<sub>TT</sub> control or mCuMV<sub>TT</sub>-MERS measured with OD<sub>450</sub>.
